# Supplementary material for: A plasmon resonance light scattering assay of glucose based on the formation of gold nanoparticles
Source: Royal Society of Chemistry journal article supplement (doi:10.1039/c4ay00206g), 2014-01-01
Supplement: c4ay00206g1.pdf [file c4ay00206g1.pdf]

## Supplementary Information

*for*

# Plasmon resonance light scattering assay of glucose based-on the formation of gold nanoparticles

Wen Bi Wu,<sup>a</sup> Lei Zhan,<sup>b</sup> Jian Wang<sup>\*a</sup> and Cheng Zhi Huang<sup>\*a,b</sup>

<sup>a</sup> *College of Pharmaceutical Science, Southwest University, Chongqing 400716, China. Fax:*

*(+86) 23 68367257; Tel: (+86) 23 68254659; E-mail: wj123456@swu.edu.cn;*

*chengzhi@swu.edu.cn*

<sup>b</sup> *Key Laboratory of Luminescent and Real-Time Analytical Chemistry (Southwest University) ,*

*Ministry of Education, College of Chemistry and Chemical Engineering, Southwest University,*

*Chongqing 400715, China*

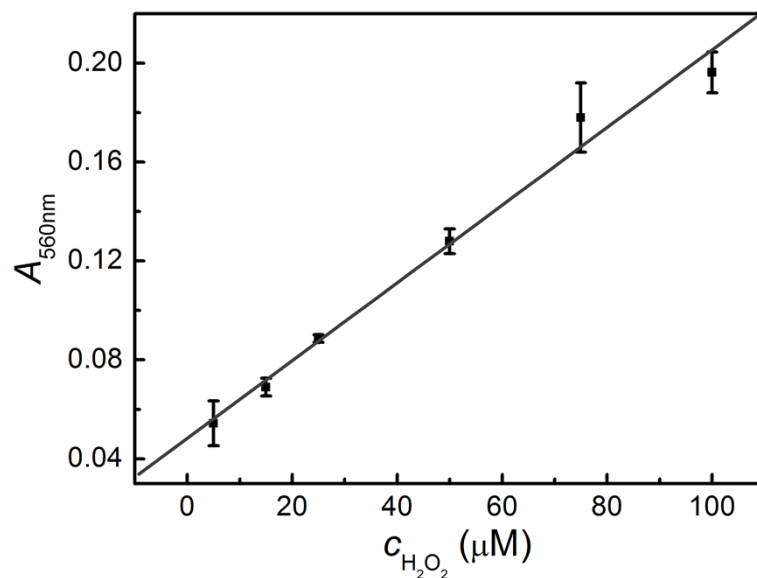

**Figure S1** Linear plots of the absorbance at 560 nm versus the concentration of  $\text{H}_2\text{O}_2$ . The linear range is from  $5 \times 10^{-6}$  M to  $1 \times 10^{-4}$  M.

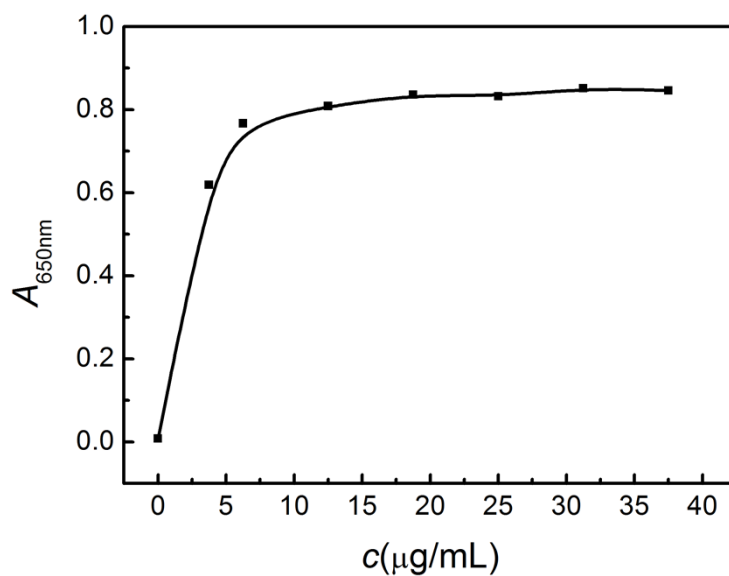

**Figure S2** Optimization of the concentration of GOx. Different concentrations of GOx were incubated with 150  $\mu\text{M}$  glucose in the presence of 10 mM PB buffer (pH 7.4) and 0.5 mM MES at 37  $^\circ\text{C}$  for 30 minutes. Then 10 mM TMB and 0.01mg/mL horseradish peroxidase were added to the above reaction solution. After reaction for 10 minutes, the mixed solution was finally used to perform absorption measurements.

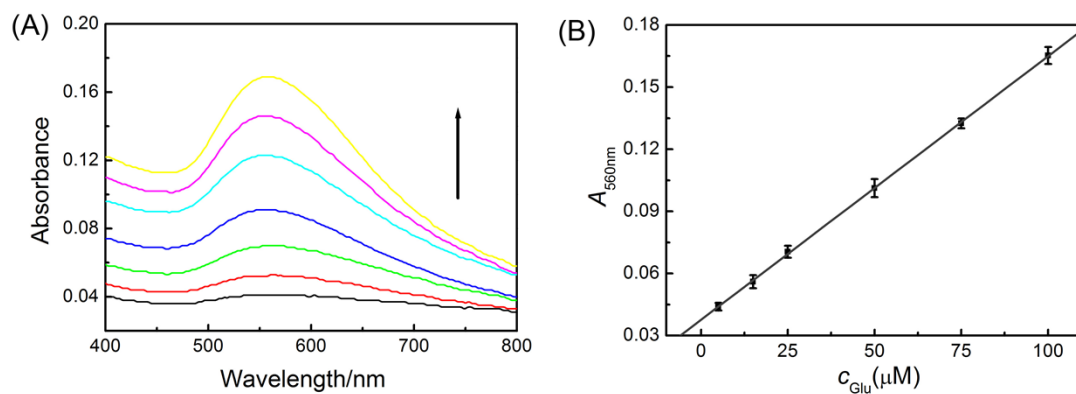

**Figure S3** (A) UV-vis absorption spectra of AuNPs generated by the reduction of  $\text{HAuCl}_4$ .  $c_{\text{glucose}}$  (from bottom to up): 0, 5, 15, 25, 50, 75, 100  $\mu\text{M}$ ;  $c_{\text{GOx}}$ , 25  $\mu\text{g mL}^{-1}$ ;  $c_{\text{HAuCl}_4}$ , 0.1 mM;  $c_{\text{MES}}$ , 0.5 mM;  $c_{\text{PB}}$ , 10 mM, pH 7.4. (B) The linear relationship between the absorbance of at 560 nm and the concentration of glucose within the range of 5–100  $\mu\text{M}$ . The error bars represent the standard deviation of three measurements.
